1  
2  
3  
4  
5  
6  
7  
8  
9  
10  
11  
12  
13  
14  
15  
16  
17  
18  
19  
20  
21  
22  
23

## **The phylogenetic and global distribution of extracellular bioplastic degrading genes**

V. R. Viljakainen,<sup>1</sup> L. A. Hug<sup>1</sup>†

<sup>1</sup>University of Waterloo, 200 University Ave W, Waterloo, ON N2L 3G1

† Address correspondence to Laura A. Hug, [laura.hug@uwaterloo.ca](mailto:laura.hug@uwaterloo.ca).

24 **Abstract**

25 Polyhydroxyalkanoates (PHAs) are a family of microbially-made polyesters that have been  
26 commercialized as biodegradable plastics. PHA production rates are predicted to increase rapidly  
27 as global concerns around environmental plastic contamination and limited fossil fuel resources  
28 have increased the importance of bio-based plastic alternatives. PHAs are meant to quickly  
29 degrade in the environment, but this degradation is reliant on microbially-secreted PHA  
30 depolymerases, whose taxonomic and environmental distribution have not been well-defined. As  
31 a result, the impact of increased PHA production and disposal on global environments is  
32 unknown. Here we used 3,842 metagenomes to analyze the distribution of PHA depolymerase  
33 genes in microbial communities from diverse aquatic, terrestrial and waste management systems.  
34 Our results indicate that extracellular PHA depolymerases are globally widespread but unevenly  
35 distributed, with certain environments showing little to no evidence for this activity. In tandem,  
36 we screened 5,290 metagenome-assembled genomes to describe the phylogenetic distribution of  
37 this trait, which is substantially broader compared to current cultured representatives. We  
38 identified members of the Proteobacteria and Bacteroidetes as key lineages with PHA  
39 biodegradation potential and predict this activity in members of the Actinobacteria, the  
40 Candidate phylum Rokubacteria, Firmicutes, Planctomycetes and Spirochaetes.

41  
42 **Importance:** Environmental concerns alongside legislation banning single-use petroleum-based  
43 plastics are expected to promote the production of bio-based plastics, including PHAs. PHAs  
44 represent a novel and emerging waste stream. If PHA disposal follows the precedent set by  
45 conventional plastics, a significant portion will be littered into the environment, or improperly  
46 discarded into landfills instead of composting facilities. Traditionally, the identification of

47 bioplastic degrading enzymes and organisms has relied on culture-dependent assays. As a result,  
48 the PHA degradation capabilities of the “unculturable” fraction of microorganisms remain  
49 largely unexplored. Here, we leverage large amounts of environmental sequence data to assess  
50 which environments harbor PHA-degrading organisms and to determine the taxonomic  
51 affiliations of bioplastic degraders. Our analyses inform our understanding of the biodegradation  
52 potential in the environment, with implications for the impact of bioplastic pollution. We identify  
53 enzymes and organisms that may be suitable for future bioremediation, chemical processing or  
54 biotechnological applications.

55

## 56 **Introduction**

57 Widespread environmental impacts associated with liberal plastic use have led to a  
58 demand for sustainable biodegradable alternatives, including polyhydroxyalkanoates (PHAs) (1).  
59 Conventional plastics rely on fossil resources and are extremely recalcitrant to degradation,  
60 causing them to accumulate in the environment (2). Annual plastic production now exceeds 380  
61 million tons (3) and accounts for approximately 6% of global fossil feedstocks (4). Plastics often  
62 serve only a short service lifespan before being discarded (1). It is estimated that, as of 2015,  
63 humans had generated 6,300 million metric tons of plastic waste (3). According to a recent  
64 global assessment, only 21% of plastic waste has been incinerated or recycled; the remaining  
65 79% has been discarded in landfills or littered into the environment (3). Plastics in the  
66 environment can harm organisms through ingestion or entanglement causing ecological damage  
67 (5). The effects of plastic pollution in the environment is a complex problem and the extent of  
68 these effects remains largely unknown (6).

69

70           New legislation aimed at mitigating the environmental impacts of plastics alongside  
71 growing public concern has generated a growing need for new biodegradable alternatives (7–9).  
72 PHAs have garnered substantial academic and industrial interest, and commercially available  
73 PHAs have been developed, for reviews see (10–12). PHAs are considered environmentally  
74 favorable to conventional plastics because they can be made from renewable carbon resources  
75 and have been shown to degrade in many different environments (13–20). 2.11 million tons of  
76 bioplastics were produced in 2018 (8). PHAs currently represent 1.4% of the global bioplastic  
77 market with production rates expected to more than double in the next five years (8).

78  
79           PHAs are a family of polyesters that are synthesized naturally by many types of bacteria  
80 and archaea as an intracellular energy and carbon storage compound (13, 21). There are over 150  
81 different types of PHA monomers which can be combined in different ways to yield polymers  
82 with a variety of chemical and structural properties (22). PHAs are broadly classified as either  
83 short-chain length (PHAscl) or medium chain length (PHAmcl) depending on the number of  
84 carbon atoms found in the monomer. PHAscl have 3-5 carbon atoms per monomer and PHAmcl  
85 have 6-15 carbon atoms per monomer. PHAs occur in two different biophysical states, which  
86 impacts which enzymes can break them down (13). Intracellular PHAs are amorphous and are  
87 found in protein-associated granules sometimes referred to as carbonosomes (23); extracellular  
88 PHAs become denatured upon extraction and take on a semi-crystalline state (13).

89  
90           PHA biodegradation in the environment is mediated by microorganisms that produce  
91 PHA depolymerases (24). PHA depolymerases are a diverse family of intracellular and  
92 extracellular carboxylesterases and are members of the alpha/beta-hydrolase fold family (25). To

93 date, approximately 35 PHA depolymerases have been isolated and biochemically characterized  
94 (Supp Data 1 and references within), from organisms within the phyla Ascomycetes, Firmicutes,  
95 Proteobacteria (most) and Actinobacteria. PHA depolymerases are classified based on  
96 subcellular location (extracellular or intracellular), substrate specificity (mcl [EC 3.1.1.76] or scl  
97 [EC 3.1.1.75]), and features of the catalytic domain (13, 25). Intracellular PHA (inPHA)  
98 depolymerases mobilize amorphous endogenous PHA stores whereas extracellular PHA (ePHA)  
99 depolymerases degrade exogenous semi-crystalline PHAs (24). ePHA depolymerases allow  
100 microorganisms to scavenge PHAs that have been released into the environment from ruptured  
101 cells (13) and are the main avenue for biodegradation of commercial PHAs. Here, we focused  
102 our analyses on ePHA depolymerases because we were interested in enzymes that are secreted  
103 into the environment and have the potential to degrade commercial PHAs.

104  
105 All known ePHA depolymerases contain a catalytic triad composed of a serine  
106 (embedded in a lipase box motif), histidine and aspartic acid (13, 25). Extracellular short chain  
107 length (ePHAscl) depolymerases typically consist of a signal peptide, a catalytic domain, a linker  
108 domain and a C-terminal substrate binding domain (25). There are two recognized ePHAscl  
109 depolymerase subtypes (denoted type 1 [T1] and type 2 [T2]) which differ in the arrangement of  
110 their catalytic domains (13). In ePHAsclT1 depolymerases the oxyanion hole is N-terminal to the  
111 lipase box, whereas in ePHAsclT2 depolymerases the oxyanion hole is C-terminal to the lipase  
112 box (25). Characterized extracellular medium-chain length (ePHAmcl) depolymerases do not  
113 exhibit a C-terminal substrate binding domain; instead the N-terminal region is presumed to  
114 mediate substrate binding (13). ePHAmcl depolymerases share no significant homology with  
115 ePHAscl depolymerases except for the catalytic triad (25), which is non-specific as it is shared

116 by all carboxylesterases (27). However, ePHAsclT1 depolymerases do share significant  
117 homology with some biochemically characterized intracellular PHAscl (inPHAscl)  
118 depolymerases (28) and ePHAsclT2 depolymerases share significant similarity with a  
119 periplasmic PHA depolymerase specific for amorphous forms of PHA (29).

120

121 Rates of plastic degradation are influenced by polymer properties (e.g., available surface  
122 area, monomeric composition, presence of additives), the extant microbial population, and  
123 abiotic factors (e.g., temperature, UV, pH) (30). PHAs are considered biodegradable, however  
124 the rate of this process depends on the polymer properties and the environmental context (1).  
125 Thus, the term “biodegradable” is ambiguous unless the conditions and rate of degradation are  
126 reported (31). Standardized tests exist to quantify degradation under specified conditions, such as  
127 industrial composts (see ASTM D5338-15) (32), but these tests cannot be applied to non-  
128 engineered environmental systems. Field studies on biodegradability have shown conflicting  
129 results, and there is a growing concern that biodegradable plastics are often not as biodegradable  
130 as claimed (33).

131

132 Here, we have focused specifically on determining which environments harbour microbes  
133 with the genetic potential to mediate PHA biodegradation. PHA biodegradation rates are strongly  
134 influenced by the abundance and diversity of microorganisms encoding PHA depolymerases  
135 (24). With PHA production levels expected to increase, a strong understanding of the distribution  
136 of PHA-degrading enzymes and organisms is crucial for understanding the impact of PHAs on  
137 the environment (24). Early culture-based studies have isolated PHAscl degrading  
138 microorganisms from different environments including soil, compost, sewage and aquatic

139 environments, but indicated that PHAmcl degraders appear to be relatively rare (13, 24).  
140 Reflecting these findings, relatively few ePHAmcl depolymerases have been characterized  
141 compared to ePHAscl depolymerases (25, 33).

142 Most PHA biodegradation research has relied heavily on culture-based approaches or  
143 black-box burial degradation trials (30). Culture-based research has developed the foundational  
144 understanding of the enzymes and organisms mediating PHA biodegradation reviewed by (13).  
145 However, a global summary of the environmental distribution of PHA depolymerases has not  
146 been reported. Many microbial lineages are currently unamenable to culturing and are only  
147 recognized from culture-independent analyses (35). With the advent of high-throughput  
148 sequencing and metagenomics, there has been a proliferation of publicly available DNA  
149 sequence data from microbial communities inhabiting diverse global environments (36, 37),  
150 enabling broad surveys of trait distributions, see (38, 39). Here, we employed a culture-  
151 independent approach using publicly available environmental sequence data to characterize the  
152 phylogenetic and environmental distribution of PHA-degrading enzymes. We screened 5,290  
153 metagenomes assembled genomes (MAGs) and 3,842 metagenomes sequenced from globally  
154 distributed natural environments and waste-management systems. Biochemically characterized  
155 ePHA depolymerases were used as biomarkers to assess the potential for PHA degradation  
156 activity in different environments and across the bacterial tree of life.

## 157 **Methods**

### 158 *Identification of ePHA depolymerases*

159 A reference set of biochemically validated ePHA depolymerases were gathered from the  
160 literature (Supp Data 1) and used as queries in a BLAST search (threshold  $e < 1 \times 10^{-10}$ ) against

161 3,842 metagenomes (Supp Data 2) and 5,290 MAGs (Supp Data 3) that were publicly available  
162 on the Integrated Microbial Genomes (IMG) system (<https://img.jgi.doe.gov>) (37). Associated  
163 IMG metadata was used to classify each dataset by environment. Datasets screened were  
164 publicly available, but permissions were requested for PIs associated with the data. Many  
165 metagenomes came from datasets associated with publications, and we acknowledge the work of  
166 the scientific community in generating such a rich database (40–55). A series of curation steps  
167 were taken to increase PHA depolymerase prediction accuracy and to reduce or eliminate non-  
168 functional homologs. Hits identified in metagenomes and MAGs were curated separately. The  
169 results of the curation process applied to MAG hits (smaller, more tractable dataset) were used to  
170 develop a computationally feasible curation protocol for metagenome hits.

171

172 *ePHA depolymerase hit curation:*

173 Unique ePHA depolymerase blast hits (threshold  $< 1 \times 10^{-10}$ ) were gathered and aligned  
174 with the corresponding reference sequences (7 ePHAmcl, 14 ePHAsclT1, and 7 ePHAsclT2)  
175 (Supp Data 4). All alignments were performed using MUSCLE v. 3.8.3 (56) as implemented in  
176 Geneious v. 10.2.6 (<https://www.geneious.com>) with default parameters. Hits were first sorted  
177 and divided into groups of similarly sized sequences before alignments were performed. This  
178 served to reduce the computational load of performing a single alignment with many dissimilar  
179 sequences and facilitated identification of areas of shared conservation with reference enzymes.  
180 An alignment-based curation was performed to identify hits that shared key catalytic residues  
181 with reference sequences (serine embedded in a lipase box motif [GxSxG], aspartic acid, and  
182 histidine, as well as the oxyanionic histidine for the ePHAscl depolymerases). To prevent  
183 removal of true PHA depolymerases containing insertions or deletions, higher scoring blast hits



184 (threshold  $e < 1 \times 10^{-30}$ ) were retained for further analyses in addition to those retained from the  
185 alignment-based curation. Genes that were highly gapped in the alignment or which were  
186 truncated within the catalytic domain were removed. Next, placement within a maximum  
187 likelihood (ML) tree was used to distinguish PHA depolymerases from other types of closely  
188 related enzymes. ML trees were constructed using RAxML-HPC2 (57) with automatic  
189 bootstrapping on the CIPRES webserver (58; Supp. Data 5). ModelTest-NG (59) was  
190 implemented for model selection assuming a uniform rate of evolution. PROTGAMMA WAG,  
191 VT+F, and WAG+F models were used for ePHAmcl, ePHAsclT1 and ePHAsclT2 hits  
192 respectively.

193

194 ML-based curation was performed using tree topology and branch length to assess  
195 relatedness to known PHA depolymerases. Representative MAG-encoded sequences for each  
196 major clade occurring in different regions of the ML tree were used as queries in a blast search  
197 against (1) the uniprot / swissprot database (<https://www.uniprot.org/>) (60); (2) NCBI's refseq  
198 database (<https://www.ncbi.nlm.nih.gov/refseq/>) (61); and (3) the pdb database  
199 ([www.wwpdb.org](http://www.wwpdb.org)) (62). Top blast hits were retrieved and used to predict clade annotations.  
200 Many MAG-encoded genes could not be confidently assigned to a PHA depolymerase subtype  
201 based on tree placement alone, due to overlapping phylogenetic signals between (1) ePHAsclT1  
202 depolymerases and inPHAscl depolymerases and (2) ePHAsclT2 depolymerases and a  
203 periplasmic PHA depolymerase.

204

205 *Ribosomal protein tree*

206 A concatenated ribosomal protein tree was constructed to phylogenetically place MAGs with  
207 predicted bioplastic degrading genes. 16 ribosomal proteins (rpL2, L3, L4, L5, L6, L14, L15,  
208 L16, L18, L22, L24, S3, S8, S10, S17 and S19) were gathered from 143 MAGs encoding  
209 predicted PHA depolymerases. Ribosomal proteins were independently aligned to a previously  
210 described bacterial reference set (35). Alignments were masked to remove columns comprised of  
211 95%+ gaps and trimmed to remove ambiguously aligned positions at the N and C termini. The  
212 16 ribosomal protein alignments were concatenated to form a final alignment composed of 2,491  
213 positions and 1,941 taxa. In tandem, MAG quality was estimated using checkM v1.0.13 (63).  
214 Thirteen poor quality MAGs (>10% redundant and/or <50% complete) were excluded from the  
215 final alignment. Fifteen MAGs were also excluded from the final alignment because their  
216 ribosomal protein complement resulted in <50% of the expected number of ungapped residues in  
217 the final alignment. A total of 115 MAGs encoding predicted PHA depolymerases were included  
218 in the final alignment. Phylogenetic placement was inferred using FastTree (64) as implemented  
219 in Geneious v.10.2.6. (<https://www.geneious.com>) and the tree was visualized using iTOL  
220 (<https://itol.embl.de/>) (65).

221

#### 222 *Environmental ePHA depolymerase hit curation*

223 Hits with an e-value <1x10<sup>-25</sup> for PHAmcl depolymerases (1,196) and <1x10<sup>-30</sup> for  
224 ePHAscl (T1: 54,986, T2: 14,042) depolymerases were gathered and aligned to reference  
225 sequences as for the MAG-derived genes. E-value thresholds were set at least five orders of  
226 magnitude lower than the lowest quality hit that had ultimately been retained during the MAG hit  
227 curation, to ensure a broad search. ePHAscl depolymerase hits missing either the lipase box  
228 motif (GxSxG) and the oxyanion hole (HGC) motif were removed before alignments were

229 performed. Alignments and phylogenetic tree placement-based curation were performed as for  
230 the MAG-derived sequences, with the following modifications to accommodate large dataset  
231 sizes. High quality blast hits, defined as  $<1 \times 10^{-40}$  for ePHAmcl and  $1 < 10^{-50}$  for ePHAscl datasets,  
232 were retained for inclusion in the tree curation steps. CD-HIT (66) was used to cluster  
233 ePHAsclT1 hits to 90% identity (word size 5) to reduce computational load of alignments and  
234 tree-based curation. After tree-based curation, near-full-length sequences occurring within the  
235 same clustered set for retained predicted ePHAsclT1 depolymerases were identified using a  
236 custom script (Supp Data 6) and included in the final ePHAsclT1 sequence set.

237  
238 Final sets of curated predicted ePHA depolymerases were independently aligned to the  
239 relevant reference enzymes using MAFFT v.7 (67) (ePHAsclT1) and MUSCLE v. 3.8.3 (56)  
240 (ePHAsclT2 and ePHAmcl). MAFFT was used for the final predicted ePHAsclT1 alignment due  
241 to large dataset size. Final protein trees were independently constructed for predicted ePHAmcl,  
242 ePHAsclT1 and ePHAsclT2 depolymerases using FastTree (68) due to dataset size. Final trees  
243 were visualized and annotated using ITOL (<https://itol.embl.de/>) (65).

244

## 245 **Results**

### 246 **Environmental distribution of PHA depolymerases**

247 To characterize the environmental capacity for PHA biodegradation, 3,842 publicly  
248 available assembled and annotated metagenomes from diverse aquatic (n=1,982), terrestrial  
249 (n=1,596), wastewater (n=230) and solid waste management systems (n=34) were screened for  
250 ePHA depolymerases (Supp Data 2). Metagenomes sequenced from all seven continents were  
251 included in our dataset but were unequally represented, with certain regions having more

252 sampled locations and sample types than others (Supp Fig 1). Biochemically validated ePHA  
253 depolymerase genes were used as biomarkers for biodegradation potential (Supp Data 1).  
254 Homology-based searches using biomarker enzymes followed by rigorous curation of predicted  
255 enzymes resulted in a global distribution for PHA depolymerases (Fig 1a). Metagenomes from  
256 North America were the most heavily represented in our dataset and nearly every environmental  
257 subtype showed some evidence for PHA degradation activity within this region (Fig 1b). A total  
258 of 13,869 PHA depolymerases were predicted in 1,295 metagenomes, sampled from aquatic  
259 (417/1,982 = 21.0%), solid waste (23/34 = 67.6 %), terrestrial (764/1,596 = 47.8%) and  
260 wastewater (91/230 = 39.5%) environments (Fig 2).

261  
262 ePHAmcl depolymerization potential was sparsely represented across environments.  
263 Only 222 ePHAmcl depolymerases were predicted out of the 13,869 ePHA identified. ePHAmcl  
264 depolymerases were identified from 153 metagenomes from aquatic (41/1,982 = 2.1%),  
265 terrestrial (94/1,596 = 5.9%), and wastewater (18/230 = 7.8%) environments (Fig 2). Predicted  
266 ePHAmcl depolymerases were placed in a ML tree anchored with biochemically characterized  
267 ePHAmcl enzymes (Supp Fig 2a). ePHAmcl depolymerases recently isolated from *Streptomyces*  
268 species share little sequence homology with other ePHAmcl biomarker enzymes and form a  
269 novel subgroup (69). Based on the ML tree, 14 predicted ePHAmcl depolymerases placed with  
270 the three ePHAmcl depolymerases isolated from *Streptomyces* (69, 70) while the other 208  
271 predicted enzymes formed a second clade with ePHAmcl biomarker enzymes isolated from  
272 species of *Bdellovibrio* (34) and *Pseudomonas* (71, 72). Based on tree placement, only a handful  
273 of predicted enzymes were closely related to biomarker enzymes; the majority of predicted

274 enzymes formed more distantly related clades. If functional, these enzymes significantly expand  
275 the known sequence diversity of ePHAmcl depolymerases.

276

277 In contrast to ePHAmcl depolymerases, ePHAscl depolymerases were more prevalent  
278 across environments. A total of 10,245 ePHAsclT1 depolymerases were predicted from 1,136  
279 metagenomes, from aquatic ( $338/1,982 = 17.1\%$ ), solid waste ( $13/34 = 38.2\%$ ), terrestrial ( $713$   
280  $/1,596 = 44.7\%$ ), and wastewater ( $72/230 = 31.3\%$ ) environments (Fig 2). For ePHAsclT2  
281 depolymerases, a total of 3,402 enzymes were predicted from 908 metagenomes from aquatic  
282 ( $264/1,982 = 13.3\%$ ), solid waste ( $22/34 = 64.7\%$ ), terrestrial ( $540/1,596 = 33.8\%$ ), and  
283 wastewater ( $82/230 = 35.6\%$ ) environments (Fig 2). Predicted ePHAscl T1 and T2  
284 depolymerases were placed in protein trees anchored with biomarker enzymes (Supp Fig 2b and  
285 2c). For both predicted ePHAscl T1 and T2 depolymerases, considerable sequence diversity was  
286 seen relative to biomarker enzymes, with large clades of putative PHA depolymerases containing  
287 no biomarker enzymes. As for ePHAmcl enzymes, this indicates the known diversity of ePHAscl  
288 enzymes may be a marked underrepresentation of the true protein family.

289

### 290 *Aquatic Environments*

291 Plastic contamination is ubiquitous in aquatic environments (6, 73). Plastic debris, either  
292 macroplastics or microplastics (typically  $<0.5\text{mm}$ ) can harm aquatic organisms through  
293 entanglement and ingestion (74). Microplastics are of particular concern because they can be  
294 ingested by organisms and serve as a vector for chemical contaminants (74). As bioplastics  
295 become more popular, it is expected that they will become a larger component of aquatic  
296 contamination. PHAs have been shown to degrade in aquatic environments, however rates can

297 vary widely depending on polymer properties, temperature, and microbial population, and can be  
298 quite slow (20, 75, 76). For example, in freshwater ponds, samples of PHAscl showed 7% mass  
299 loss after six months (20). In marine water, PHAscl bottles showed only minor disintegration  
300 after a year (76). Relatively little research has characterized the degradation of PHAmcl in  
301 aquatic environments, and PHAmcl degraders are typically scarce relative to PHAscl degrading  
302 organisms (69, 77).

303  
304 Here, we screened 1,982 aquatic metagenomes for evidence of microbial PHA  
305 biodegradation potential. Our analyses included 946 freshwater, 452 marine, 87 non-marine  
306 saline and alkaline, 114 sediment and 383 thermal spring metagenomes. Less than half of the  
307 aquatic metagenomes we screened contained any type of predicted ePHA depolymerases (Fig 2).  
308 The highest proportion of aquatic metagenomes with predicted PHA depolymerization potential  
309 were from sediments ( $55/114 = 48.2\%$ ) followed by non-marine saline and alkaline ( $31/87 =$   
310  $35.6\%$ ) and marine environments ( $140/452 = 31.0\%$ ). Only 19.2% of freshwater metagenomes  
311 ( $182/946$ ) and 2.3% of thermal spring metagenomes ( $9/383$ ) contained predicted ePHA  
312 depolymerases.

313  
314 Very few aquatic metagenomes showed evidence for ePHAmcl depolymerization  
315 potential. Only 1.9% ( $18/946$ ) freshwater, 3.5% ( $16/452$ ) marine, 2.3% ( $2/87$ ) non-marine saline  
316 and alkaline, 3.5% ( $4/114$ ) sediment, and 0.3% ( $1/383$ ) thermal spring metagenomes had  
317 predicted ePHAmcl depolymerases. In contrast to ePHAmcl, all aquatic environmental subtypes  
318 had predicted ePHAscl depolymerization potential to some degree (ePHAsclT1 and ePHAsclT2  
319 depolymerases). 43.9% ( $50/114$ ) of sediment, 24.1% ( $21/87$ ) of non-marine saline and alkaline,

320 20.4% (92/452) of marine, and 17.5% (166/946) of freshwater metagenomes contained predicted  
321 ePHAsclT1 depolymerases. Very few thermal spring metagenomes (9/383 = 2.34%) had these  
322 predicted depolymerases. For ePHAsclT2 depolymerases, the highest proportion of  
323 metagenomes encoding this activity was sediments (45/114 = 39.5%), followed by 21.7%  
324 (98/452) marine, 20.7% (18/87) non-marine saline and alkaline environments, and only 0.5%  
325 (2/383) thermal spring metagenomes. Thermal spring metagenomes had the lowest PHA  
326 degradation potential across all aquatic environmental subtypes.

327  
328 In aquatic environments, plastics provide a surface for microbial colonization and biofilm  
329 formation (78). Few studies have characterized how microbial assemblages change and respond  
330 to bioplastic waste, including PHAs. Pinnell & Turner (2017) found that PHA-associated  
331 biofilms in benthic coastal marine environments were distinct from non-biodegradable  
332 polyethylene terephthalate controls and were dominated by sulfate-reducing microorganisms  
333 (79). These results indicate that PHA waste may alter microbial communities and have  
334 unintentional impacts on biogeochemical activities in this environment through the stimulation  
335 of sulfate reducers. Our analyses indicate that the majority of aquatic environments are not  
336 equipped with an abundance of PHA degrading organisms. This may suggest that bioplastics  
337 (particularly PHAmcl products) may persist longer than anticipated in these environments, or  
338 their presence may slowly enrich for bioplastic-degrading organisms, altering the local microbial  
339 community structure.

340

341 *Terrestrial Environments*

342 Soil microbial communities have been extremely well-sampled globally relative to other  
343 environments. From our screen, 51.5% (740/1,437) of soil metagenomes show ePHA  
344 depolymerization potential (Fig 2). Other terrestrial environments with evidence for this activity  
345 were deep subsurface environments (21/143= 14.7%) and rock-dwelling communities (3/3 =  
346 100.0%). Loam (0/3), peat (0/5) and volcanic (0/5) microbial communities showed no evidence  
347 for ePHA depolymerization potential, although this may be an artifact of small sample sizes for  
348 these environments.

349  
350 Rock-dwelling metagenomes were not predicted to contain any ePHAmcl depolymerases,  
351 whereas 0.7% (1/143) of deep subsurface and 6.5% (93/1,437) of soil metagenomes did encode  
352 one or more predicted ePHAmcl depolymerases. 13.3% (19/143) deep subsurface, 100% (3/3)  
353 rock-dwelling, and 48.1% (691/1,437) of soil metagenomes screened positive for ePHAsclT1  
354 depolymerases. ePHAsclT2 depolymerases were predicted in 5.6% (8/143) of deep subsurface,  
355 66.7% (2/3) of rock-dwelling environments, and 36.9% (530/1437) of soil metagenomes.

356  
357 Recently, culture-independent approaches have revealed the diversity and heterogeneity  
358 of soil microbial communities. Soil can have distinct microbial communities across micrometers  
359 or millimeters in space (80). PHAscl biodegradation in soil has been well-studied and many PHA  
360 degrading organisms, mostly polyhydroxybutyrate (PHB) degraders (the most common type of  
361 PHA monomer), have been isolated from these environments (14, 17, 30, 81). Again, less work  
362 has characterized PHAmcl degradation in soils relative to PHAscl products. However, in tropical  
363 soils, PHAmcl has been showed to degrade much more slowly compared to PHB films (77).

364



365 *Solid Waste Environments*

366 Over half of metagenomes screened from solid waste environment subtypes contained  
367 predicted ePHAscl depolymerases, with 66.7% (20/30) of compost metagenomes and 75.0%  
368 (3/4) of landfill metagenomes showing ePHA depolymerization potential. When parsed by  
369 ePHAscl depolymerase subtype, 33.3% (10/30) of compost and 75.0% (3/4) of landfill samples  
370 had predicted ePHAsclT1 depolymerases and 63.3% (19/30) of compost and 75.0% (3/4) of  
371 landfill metagenomes had predicted ePHAsclT2 depolymerases. Notably, our analyses did not  
372 predict any ePHAmcl depolymerases from solid waste environments, which may have  
373 implications for bioplastic waste-management.

374 Composting is considered the ideal way to handle certain types of biodegradable plastic  
375 waste because it allows for energy and material recovery (31). Furthermore, since plastics are  
376 broken down, they are removed as a potential physical threat to organisms in the environment.  
377 Composting expands the end-of-life options available for bioplastics and is particularly  
378 beneficial when mechanical recycling is not an option (31). However, composting requires  
379 existing infrastructure and collection systems and access to these varies based on locale (82).  
380 Commercial PHA products are certified as compostable under various standards, including the  
381 European standard (EN 13432) which stipulates that under industrial composting conditions 90%  
382 of the plastic must be converted to CO<sub>2</sub> after six months (31). It was concerning that a third of  
383 composting samples showed no predicted PHA depolymerases. This may reflect a lack of  
384 bioplastics in the current waste streams, where low abundance degraders are below current  
385 detection limits, or may indicate a future requirement for targeted amendment of bioplastic  
386 degrading organisms to composting facilities to ensure degradation occurs at mandated rates.  
387

388 A large fraction of plastic waste is disposed of in landfills. Despite landfills being a likely  
389 site of disposal, very little characterization of the biodegradation of biodegradable plastics in  
390 landfills has taken place (82). Very few plastics are recycled due to low consumer compliance,  
391 lack of infrastructure, and contamination of recycling streams (3). Bioplastics will likely follow  
392 this precedent, although because they can be composted, a larger proportion may be diverted  
393 away from landfills. Landfills are not an ideal solution for bioplastic waste; plastics in landfills  
394 represent a lost opportunity as their stored energy cannot be recovered and they take up valuable  
395 space (1, 83). Landfills are complex heterogenous environments and landfill microbial  
396 communities are not well-characterized (84). The landfill metagenomes included in our analyses  
397 originated from a Canadian site and showed the potential for PHAs<sub>cl</sub> degradation, but not  
398 PHAm<sub>cl</sub> degradation. It is thus possible that PHAm<sub>cl</sub> polymers will behave similarly to  
399 conventional plastics and remain relatively inert over a long timeframe. This poses little threat to  
400 the environment provided landfills are well-maintained and do not disperse wastes into the  
401 surrounding environments, but this cannot be assumed for 100% of landfilled bioplastics. Our  
402 identification of predicted ePHAs<sub>cl</sub> depolymerases in landfill metagenomes coupled with data  
403 from earlier studies indicates that ePHAs<sub>cl</sub> plastics biodegrade in landfills if amenable abiotic  
404 conditions (temperature, pH, moisture) are maintained. One concern is that anoxic degradation of  
405 PHAs generates greenhouse gases in the form of CO<sub>2</sub> and CH<sub>4</sub> (24). However, most modern  
406 landfills have infrastructure to capture methane as biogas, generating energy and reducing  
407 greenhouse gas emissions, which would mitigate harmful by-products of landfill PHA  
408 degradation (85).

409

410 *Wastewater Environments*

411 Within wastewater environments, the majority of anaerobic digestors (51/54 = 94.4%)  
412 and nutrient removal communities (27/35=77.1%) were predicted to conduct ePHA degradation,  
413 whereas only a small fraction of activated sludge communities showed evidence for this activity  
414 (13/141=9.2%).

415 ePHAmcl depolymerases were predicted in 7.8% (11/141) of activated sludge, 18.5%  
416 (10/54) of anaerobic digestors, and 57.1% (20/35) of nutrient removal systems. A high  
417 proportion of anaerobic digestors (38/54=70.4%) and nutrient removal systems (21/35 = 60.0%)  
418 had predicted ePHAsclT1 depolymerases whereas only 9.2% (13/141) of activated sludge  
419 environments had predicted enzymes. ePHAsclT2 depolymerases were also well-represented in  
420 anaerobic digestors (47/54 = 87.0%) and nutrient removal systems (27/35=77.1%), but only  
421 occurred in 8/141, or 5.7% of activated sludge metagenomes.

422  
423 Interestingly, wastewater can be used as a carbon source for PHA production , and  
424 appears to be a promising avenue for biopolymer production (86). Given the potential presence  
425 of PHA degraders in the majority of wastewater systems, there is the possibility of a circular  
426 system, where wastewater acts as both feedstock and waste processing components of the  
427 bioplastic lifecycle.

428

#### 429 **Phylogenetic distribution of predicted PHA depolymerases**

430 We screened 5,290 MAGs available on IMG for ePHA depolymerases, comprising 4,927  
431 bacterial and 363 archaeal genomes. Screened MAGs were reconstructed from metagenomes  
432 originating from engineered (443), environmental (4,659), host-associated (186), and  
433 unclassified (2) systems (Supp Data 3). We identified 143 MAGs (2.7%) encoding a total of 231

434 predicted extracellular PHA depolymerases. CheckM was used to assess MAG quality, with 130  
435 MAGs >50% percent complete and <10% redundant, within which 122 MAGs were >70%  
436 complete and <10% redundant (Supp Data 7). All MAGs encoding predicted ePHA  
437 depolymerases were from the bacterial domain. A number of distantly related genes were  
438 identified in archaeal MAGs but these did not pass our curation steps. These archaeal sequences  
439 may represent true PHA depolymerases that are distantly related from reference enzymes and  
440 thus may be interesting targets for future characterization (Supp Data 8).

441  
442 A concatenated ribosomal protein tree was created to phylogenetically place the 115  
443 predicted ePHA degrading MAGs that were >50% complete and <10% redundant and had an  
444 appropriate complement of ribosomal proteins (see methods) (Fig 3). From this, 6 pairs of  
445 curated MAGs had identical concatenated ribosomal protein sequences. These MAG pairs often  
446 originated from related samples (e.g., time series samples of the same environment), indicating  
447 they may represent the same bacterial populations (Supp Data 7). From the curated set of 115  
448 MAGs, we identified putative PHA depolymerases from members of the Proteobacteria (92),  
449 Bacteroidetes (14), Actinobacteria (3), Firmicutes (2), Candidate phylum Rokubacteria (2),  
450 Spirochaetes (1), and Planctomycetes (1). Notably, we did not detect PHA biodegradation  
451 potential in any MAGs associated with the Candidate Phyla Radiation/Patescibacteria. Prior to  
452 our screen, bacterial PHA depolymerases were reported from the Proteobacteria, the  
453 Actinobacteria and the Firmicutes, as well as one fungal phylum, the Ascomycetes. Our screen  
454 extends the phylogenetic distribution of this activity to four additional bacterial phyla, doubling  
455 its taxonomic diversity. The distribution of fungal PHA depolymerases was not investigated in

456 our screen, but is an important avenue for future characterization to holistically characterize PHA  
457 depolymerization potential.

458

459         The vast majority of the predicted PHA degrading organisms were Proteobacteria, with  
460 13 Alphaproteobacterial, 51 Betaproteobacterial, 8 Deltaproteobacterial, 18  
461 Gammaproteobacterial and two Oligoflexia MAGs identified. Alphaproteobacterial MAGs with  
462 ePHA depolymerases were from marine, freshwater, and soil environments, with members of the  
463 families Rhizobiales (7), Sphingomonadales (4), and Rhodobacterales (1), and two unclassified  
464 Alphaproteobacteria. Many Betaproteobacterial PHA degraders have been identified through  
465 culture-based studies, particularly from soils (13). As a result, many of the biomarker enzymes  
466 used in our screen were from this class (Supp Data 1 and references within). The  
467 Betaproteobacterial MAGs with predicted PHA degradative capacity were predominantly from  
468 the Burkholderiales (31), but also from the Rhodocyclales (2) and unclassified lineages (13). The  
469 Burkholderiales *Paucimonas lemoignei* is a model organism for PHA degradation and encodes at  
470 least five PHA depolymerases (87). It is not clear whether PHA depolymerases from this class  
471 were so abundant in our screen due to a detection bias based on the closely related biomarker  
472 enzymes in our reference set or because this family is genuinely enriched for this function  
473 compared to other lineages. Eight Deltaproteobacteria with PHA depolymerization potential  
474 were identified, including six Myxococcales, a Desulfobacterales and an unclassified bacterium.  
475 A total of 18 Gammaproteobacteria including species from the Alteromonadales (6),  
476 Chromatiales (1), Methylococcales (1), Oceanospirillales (3), Pseudomonadales (1),  
477 Xanthomonadales (2), and four unclassified organisms were predicted to encode ePHA  
478 depolymerases.

479           Beyond the Proteobacteria, 13 MAGs from the Bacteroidetes encoded predicted  
480 ePHAsclT1 depolymerase(s). All encoded a single predicted ePHAsclT1 except for two  
481 unclassified bacteria from soil and groundwater which each encoded two predicted ePHAsclT1  
482 enzymes that shared high-level of sequence identities. Bacteroidetes with predicted ePHA  
483 degradation capacities included an unclassified Cryomorphaceae (Flavobacteria) and an  
484 unclassified Saprospiraceae (Saprospira) from a wastewater nutrient removal system, and nine  
485 unclassified organisms from groundwater. The three Actinobacteria MAGs were predicted to  
486 encode ePHAsclT1 depolymerases. Two were unclassified members of the Pseudonocardiales  
487 from soil. One of these MAGs encoded a single ePHAsclT1 depolymerase whereas the other  
488 encoded two. The third Actinobacteria MAG was from an organism from the Actinomycetales.  
489 Two Firmicutes from the Clostridiales sequenced from an anerobic bioreactor were predicted to  
490 have PHAmcl depolymerization potential. One unclassified Spirochaetes bacterium from  
491 groundwater was predicted to encode three closely related ePHAsclT1 depolymerases. Two  
492 MAGs from the Candidate phylum Rokubacteria from groundwater and soil had predicted  
493 ePHAsclT1 depolymerases. One nutrient removal wastewater system-derived Planctomycetes  
494 MAG from the Phycisphaerales encoded a predicted ePHAsclT1. For a detailed overview of the  
495 PHA depolymerase complement for each MAG, please see Supp Data 7.

496

#### 497 ***MAGs encoding multiple predicted PHA depolymerases***

498           Of the 115 high-quality MAGs with PHA biodegradation potential, 67 were predicted to  
499 encode one PHA depolymerase, 24 were predicted to encode two, 23 were predicted to encode  
500 three, and one, a Burkholderiales, was predicted to encode nine PHA depolymerases (Supp Data  
501 7).

502 The Burkholderiales MAG encoding nine putative PHA depolymerases originated from  
503 soil and was 98% complete and 5% redundant. Predicted depolymerases included two closely  
504 related ePHAsclT1, four ePHAsclT2 and three closely related ePHAmcl depolymerases.

505 MAGs from the Proteobacteria (22) and Spirochaetes (1) encoded three predicted ePHA  
506 depolymerases. One Alpha-, 18 Beta-, one Delta- and two Gammaproteobacteria all encoded  
507 three predicted PHA depolymerases. An Alphaproteobacterial MAG (100% complete, 1%  
508 redundant) that placed near the Bradyrhizobiaceae of the Rhizobiales encoded three closely  
509 related ePHAsclT1 enzymes. From the Betaproteobacterial MAGs, eight closely related  
510 *Candidatus* Accumulibacter organisms encoded two ePHAsclT2 enzymes and one ePHAsclT1  
511 enzyme (all >84% complete, <5% redundant). PHA cycling is a core phenotype to the  
512 *Candidatus* Accumulibacter lineage, though most focus has been on PHA synthesis to date (49).  
513 Nine Burkholderiales encoded three ePHAscl enzymes and one Rhodocyclales (98% complete  
514 and 0% redundant) encoded one predicted ePHAsclT1 and two predicted ePHAsclT2 enzymes.  
515 For the Gammaproteobacteria, two near-identical *Halomonas* MAGs of the Oceanospirillales  
516 (both 99% complete, 1% redundant) encoded two ePHAsclT1 and one ePHAsclT2. The  
517 Spirochaetes MAG (90% complete, 0% redundant) had three predicted  
518 ePHAsclT1 depolymerases that clustered closely within the ML tree.

519

## 520 ***Distribution of PHA depolymerase subtypes***

521 **ePHAmcl depolymerases:** We predicted 10 ePHAmcl depolymerase genes from 8 MAGs (Fig  
522 4a). A soil Burkholderiales bacterium from the Betaproteobacteria encoded 3 predicted enzymes.  
523 The remaining putative ePHAmcl depolymerases were found as singletons within MAGs,  
524 including a Pseudomonadales (Gammaproteobacteria) from soil, two Myxococcales

525 (Deltaproteobacteria) from a wastewater bioreactor and a marine environment, two *Sandaracinus*  
526 spp. (Deltaproteobacteria) from a marine environment, and a *Clostridium* (Firmicutes) from an  
527 anaerobic bioreactor (Fig. 4a). To our knowledge, ePHAmcl depolymerases have not previously  
528 been identified in the Firmicutes. Several *Clostridia* species are human pathogens and obligate  
529 anaerobes (88) which may have hindered recognition of PHA degrading activity in cultivation-  
530 based studies, which have largely been conducted aerobically. Based on ML analyses, the  
531 putative *Clostridium* ePHAmcl depolymerases were more closely related to the *Streptomyces*  
532 ePHAmcl depolymerase subgroup, whereas the other predicted PHAmcl enzymes were more  
533 closely related to those isolated from *Pseudomonas* and *Bdellovibrio* (Fig 4a).

534  
535 ***ePHAsclT1 depolymerases:*** We predicted 156 ePHAsclT1 depolymerases in 120 unique MAGs  
536 from the Actinobacteria (7), Bacteroidetes (17), Candidate phylum Rokubacteria (2),  
537 Planctomycetes (1), Proteobacteria (125), Spirochaetes (3) and Tenericutes (1) (Fig 4b).  
538 ePHAsclT1 depolymerases are the most well-characterized type of PHA depolymerase (13, 24).  
539 Biochemically validated enzymes in our reference set originated from species of *Pseudomonas*  
540 (Gammaproteobacteria), *Ralstonia* (Betaproteobacteria), *Paucimonas* (Betaproteobacteria),  
541 *Alcaligenes* (Betaproteobacteria), and *Bacillus* (Firmicutes) (Supp Data 1 and references within).  
542 Our screen extends the distribution of ePHAsclT1 enzymes to a further six phyla. An ePHAsclT1  
543 depolymerase was also identified from a Tenericute MAG, however due to MAG quality (49%  
544 complete, 0% redundant), it was excluded from the final concatenated ribosomal protein tree.

545  
546 ***ePHAsclT2 depolymerases:*** We predicted 65 ePHAsclT2 depolymerases in 48 MAGs from  
547 members of the Alpha, Beta and Gammaproteobacteria (Fig 4c). Most ePHAsclT2 biochemically



548 validated enzymes originated from members of the Burkholderiales family (Betaproteobacteria).  
549 Additional reference enzymes came from *Streptomyces* (Actinobacteria) and a *Penicillium*  
550 (Ascomycota), neither of which had related sequences in our environmentally-derived  
551 ePHAsclT2 depolymerases (Supp Data 1 and references within).

552

### 553 *Summary of environmental distribution data*

554 Screening of metagenomic sequence data from diverse aquatic, terrestrial and waste-  
555 management environments revealed that, while PHA-degrading bacteria are globally distributed,  
556 some environments show very little evidence for this activity. In particular, less than a third of  
557 the thermal springs, freshwater and marine environments we screened showed evidence for  
558 degradative capacity. This patchy distribution of PHA depolymerases may have impacts for  
559 pollution mitigation. If biodegradable plastics do not degrade in the environment at an  
560 appreciable rate, they have the potential to cause ecological damage analogous to conventional  
561 plastics. Alternatively, the presence of bioplastic waste may select for low-abundance  
562 community members with PHA degradation capacity and significantly alter microbial  
563 communities, which may have downstream consequences on global biogeochemical cycling.  
564

565 Notably, PHAmcl depolymerases were poorly represented in the global dataset,  
566 indicating degradation of bioplastics with medium chain monomers may not be robust in most  
567 environments. There are very few reports of isolated PHAmcl degraders (69). PHAmcls are not  
568 easily emulsified into microbiological media, which may have hindered their detection in clear  
569 zone assays (13). This is an unfortunate gap because the more flexible and less brittle properties  
570 of PHAmcl make them more suitable than PHAscl for certain applications (89). Our screen

571 confirms the sparse environmental distribution of mcl PHA degrading organisms, with less than  
572 5% of environmental samples showing evidence for PHAmcl degradation capacity. This suggests  
573 that commercial PHAs may be substantially more recalcitrant to degradation than current  
574 forecasts.

575

#### 576 *Summary of phylogenetic distribution data*

577 We predicted PHA depolymerization activity for organisms from seven different phylum-  
578 level lineages, where existing reference enzymes derive from only three bacterial phyla. The  
579 majority of PHA depolymerases were identified from Proteobacteria, and specifically from the  
580 Betaproteobacteria. The majority of MAGs encoded one or two ePHA depolymerases, with a  
581 similarly low proportion of PHAmcl enzymes as were predicted from the environmental  
582 metagenomes. Our ePHAmcl reference set originated from only two Proteobacterial classes and  
583 the Actinobacteria. However, our analyses expanded the predicted distribution of PHAmcl  
584 depolymerases to the Firmicutes as well as an additional class of Proteobacteria. One organism, a  
585 Burkholderiales, encoded a complement of nine ePHA depolymerases, suggesting it may be an  
586 active, efficient, and/or highly versatile degrader.

587

#### 588 **Conclusions**

589 This work presents the first summary of the global environmental and phylogenetic  
590 distribution of ePHA depolymerases using cultivation-independent approaches. Our analyses  
591 present a carefully curated set of predicted PHA depolymerases which provide a conservative  
592 estimate of the existing sequence diversity and environmental distribution of these protein  
593 families. Our screen predicts that many environments are not well-suited for PHA degradation,

594 which is a concern as this class of bioplastics increases in production. To fully determine  
595 bioplastic fate in global environments, a combination of metagenomic predictions from public  
596 datasets, burial degradation trials with functional profiling, and biochemical validation of  
597 predicted enzymes (particularly in enzymes distantly related to biomarker enzymes) is needed.  
598 This comprehensive examination would help establish the true diversity of functional PHA  
599 depolymerases and allow for more accurate activity predictions in the future.

600  
601 Our analyses provide insights into the bioplastic degradation potential of microbial  
602 communities found around the world in unique and relevant environments. Understanding the  
603 limitations for bioplastic degradation in global environments is critical to ensure that the proper  
604 waste-management solutions are developed and enforced. Biodegradable plastics that meet  
605 compost certifications degrade under specified conditions that may not be present in a natural  
606 environment, and therefore rates of biodegradation may be highly variable. It is important that  
607 consumers do not assume that biodegradable plastics can be littered into the environment without  
608 consequence. Polymeric properties such as monomeric composition, surface area, and  
609 crystallinity strongly influence PHA biodegradability, but the underlying microbial community  
610 and the enzymes they secrete is critical for mediating bioplastic depolymerization (1, 13). The  
611 key bioplastic degraders occurring in the environment may aid in the development of future  
612 bioremediation options for these plastics and may include enzymes and organisms suitable for  
613 use as waste-management tools in the processing, degradation or chemical recycling of these  
614 plastics.

615

616 **Acknowledgements**

617 We would like to thank Angus Hilts for help with technical infrastructure. We would also like to  
618 extend our gratitude to the scientific community sequencing environmental metagenomes for  
619 their part in developing global data repositories. LAH is supported by a Tier II Canada Research  
620 Chair, and this work was funded by an NSERC Discovery grant (2016-03686) to LAH. A  
621 significant proportion of the datasets used were derived from grant support to Jill Banfield under  
622 DOE Office of Science BER grant DOE-SC10010566 and National Science Foundation grant  
623 CZP EAR-1331940; and to James Tiedje under DOE Office of Science BER DE-FC02-  
624 07ER64494.

625

## 626 **Figures**

627

628 **Figure 1:** 13,869 PHA depolymerases were predicted in 1,295 globally distributed metagenomes  
629 from aquatic (417), terrestrial (764), solid waste (23) and wastewater (91) environments. **A)**  
630 World map showing geocoordinates of samples with metagenomes containing one or more  
631 predicted PHA depolymerase, colored by environmental subtype. **B)** Detailed view of North  
632 America, which had many samples predicted to contain PHA depolymerases.

633

634 **Figure 2:** Environmental distribution of 13,869 PHA depolymerases (222 ePHAmcl, 10,245  
635 ePHAscIT1 and 3,402 ePHAscIT2 depolymerases) identified by screening 3,842 metagenomes.  
636 Graph depicts the percentage of metagenomes that contained one or more predicted PHA  
637 depolymerase.

638

639 **Figure 3:** The predicted phylogenetic distribution of PHA degrading bacteria. Two concatenated  
640 ribosomal protein trees inferred using FastTree show the placement of 115 high-quality MAGs

641 encoding predicted PHA depolymerases within the bacterial domain. **A)** All predicted PHA  
642 degrading organisms place within select phyla in a shared region (purple) of bacterial diversity,  
643 excluding the Candidate Phylum Radiation/Patescibacteria. **B)** Detailed phylogeny of the purple  
644 subset of bacteria from (A) containing all MAGs encoding predicted ePHA depolymerases.  
645 Phyla containing members with predicted PHA depolymerases are indicated by the coloured  
646 inner ring, and the number of predicted scl and mcl PHA depolymerases in each MAG are  
647 indicated by the size of the circles in the outer rings.

648  
649 **Figure 4:** Environmental origin and phylogenetic relationships of the 231 PHA depolymerases  
650 predicted from 143 MAGs. Outer rings are colored by environmental origin of predicted PHA  
651 depolymerases. Inner rings are colored by phylum of the MAG encoding the predicted PHA  
652 depolymerase. ML trees showing **A)** 10 (8 unique) ePHAmcl depolymerases **B)** 156 (133  
653 unique) ePHAscl T1 depolymerases and **C)** 65 (56 unique) ePHAscl T2 depolymerases.

654  
655 **Supplementary Figures**

656  
657 **Supplementary Figure 1:** World map showing geocoordinates of sampling locations for the  
658 3,842 metagenomes screened in this analysis, colored by environmental subtype. Several  
659 samples share geocoordinates and represent samples taken at different depths, samples taken  
660 within close proximity to each other, or at different time points.

661  
662 **Supplementary Figure 2:** Environmental origin and phylogenetic relationships of the 13,869  
663 predicted PHA depolymerases identified in 1,295 metagenomes. Outer colored ring indicates the

664 environmental origin of the metagenome encoding each predicted PHA depolymerase.  
665 Biomarker enzymes are indicated with black arrows. Protein trees were inferred with FastTree  
666 and show the sequence diversity of A) 222 predicted ePHAmcl depolymerases B) 10,245  
667 predicted ePHAsclT1 depolymerases and C) 3,402 predicted ePHAsclT2 depolymerases, each  
668 with biochemically confirmed biomarker proteins included as references.

669

### 670 **Supplementary Data Files**

671 **Supplementary Data 1:** Supp\_Data\_1\_PHA\_depolymerases\_references.xls

672 **Supplementary Data 2:** Supp\_Data\_2\_PHA\_depolymerase\_reference\_set\_191118.fasta

673 **Supplementary Data 3:** Supp\_Data\_3\_3842\_IMG\_metadata.xls

674 **Supplementary Data 4:** Supp\_Data\_4\_5290\_IMG\_MAGs\_metadata.xls

675 **Supplementary Data 5:** Supp\_Data\_5\_final\_trees\_in\_newick\_format.txt

676 **Supplementary Data 6:** Supp\_Data\_6\_cd\_hit\_uncluster\_using\_lengths.txt

677 **Supplementary Data 7:** Supp\_Data\_7\_PHA\_depolymerase\_MAGs\_CheckM\_env.xls

678 **Supplementary Data 8:** Supp\_Data\_8\_unique\_archaeal\_IMG\_MAG\_hits\_e10.xls

### 679 **References**

- 680 1. Shah AA, Hasan F, Hameed A, Ahmed S. 2008. Biological degradation of plastics: A  
681 comprehensive review. *Biotechnology Advances* 26:246–265.
- 682 2. Barnes D, Galgani F, Thompson RC, Barlaz M. 2009. Accumulation and fragmentation  
683 of plastic debris in global environments. *Philosophical Transactions of the Royal Society*  
684 *B: Biological Sciences* 364:1985–1998.
- 685 3. Geyer R, Jambeck JR, Law KL. 2017. Production, use, and fate of all plastics ever made.  
686 *Science Advances* 3:25–29.
- 687 4. Ellen MacArthur Foundation. 2016. *The New Plastics Economy: Rethinking the future of*  
688 *plastics*. World Economic Forum, Cologne, Switzerland.
- 689 5. Li WC, Tse HF, Fok L. 2016. *Plastic waste in the marine environment: A review of*  
690 *sources, occurrence and effects*. *Science of the Total Environment*. Elsevier B.V.
- 691 6. Law KL. 2017. *Plastics in the marine environment*. *Annual Review of Marine Science*  
692 1:63–67.

- 693 7. Excell C, Salcedo-La Viña C, Worker J, Moses E. 2018. Legal Limits on Single-Use  
694 Plastics and Microplastics: A Global Review of National Laws and Regulation. United  
695 Nations Environment Programme, Nairobi, Kenya.
- 696 8. European Bioplastics. 2018. Bioplastics market data 2018. European Bioplastics, Berlin,  
697 Germany.
- 698 9. Aeschelmann F, Carus M. 2015. Biobased building blocks and polymers in the world:  
699 Capacities, production, and applications-status quo and trends towards 2020. *Industrial  
700 Biotechnology* 11:154–159.
- 701 10. Koller M, Maršálek L, de Sousa Dias MM, Braunegg G. 2017. Producing microbial  
702 polyhydroxyalkanoate (PHA) biopolyesters in a sustainable manner. *New Biotechnology*  
703 37:24–38.
- 704 11. Chen GQ, Jiang XR. 2017. Engineering bacteria for enhanced polyhydroxyalkanoates  
705 (PHA) biosynthesis. *Synthetic and Systems Biotechnology* 2:192–197.
- 706 12. Park SJ, Kim TW, Kim MK, Lee SY, Lim SC. 2012. Advanced bacterial  
707 polyhydroxyalkanoates: Towards a versatile and sustainable platform for unnatural tailor-  
708 made polyesters. *Biotechnology Advances* 30:1196–1206.
- 709 13. Jendrossek D, Handrick R. 2002. Microbial Degradation of Polyhydroxyalkanoates.  
710 *Annual Review of Microbiology* 56:403–432.
- 711 14. Boyandin AN, Prudnikova S v., Karpov VA, Ivonin VN, Dõ NL, Nguyễn TH, Lê TH,  
712 Filichev NL, Levin AL, Filipenko ML, Volova TG, Gitelson II. 2013. Microbial  
713 degradation of polyhydroxyalkanoates in tropical soils. *International Biodeterioration and  
714 Biodegradation* 83:77–84.
- 715 15. Nishida H, Tokiwa Y. 1993. Distribution of Poly( $\beta$ -hydroxybutyrate) and Poly( $\epsilon$ -  
716 caprolactone) Aerobic Degrading Microorganisms in Different Environments. *Journal of  
717 Environmental Polymer Degradation* 1:227–233.
- 718 16. Dilkes-Hoffman LS, Lant PA, Laycock B, Pratt S. 2019. The rate of biodegradation of  
719 PHA bioplastics in the marine environment: A meta-study. *Marine Pollution Bulletin*  
720 142:15–24.
- 721 17. Altaee N, El-Hiti GA, Fahdil A, Sudesh K, Yousif E. 2016. Biodegradation of different  
722 formulations of polyhydroxybutyrate films in soil. *SpringerPlus* 5:1–12.
- 723 18. Volova TG, Boyandin AN, Vasil'ev AD, Karpov VA, Kozhevnikov I v., Prudnikova S  
724 v., Rudnev VP, Xuân BB, Dũng VV, Gitel'zon II. 2011. Biodegradation of  
725 polyhydroxyalkanoates (PHAs) in the South China Sea and identification of PHA-  
726 degrading bacteria. *Microbiology* 80:252–260.
- 727 19. Voinova O, Gladyshev M, Volova TG. 2008. Comparative study of PHA degradation in  
728 natural reservoirs having various types of ecosystems. *Macromolecular Symposia* 269:34–  
729 37.
- 730 20. Mergaert J, Wouters A, Anderson C, Swings J. 1995. *In situ* biodegradation of poly(3-  
731 hydroxybutyrate) and poly(3-hydroxybutyrate-co-3-hydroxyvalerate) in natural waters.  
732 *Canadian Journal of Microbiology* 41:154–159.
- 733 21. Fernandez-Castillo R, Rodriguez-valera F, Gonzalez-Ramos J, Ruiz-Berraquero F. 1986.  
734 Accumulation of Poly(B-Hydroxybutyrate) by Halobacteria 51:214–216.
- 735 22. Kadouri D, Jurkevitch E, Okon Y. 2003. Poly  $\beta$ -hydroxybutyrate depolymerase (*PhaZ*)  
736 in *Azospirillum brasilense* and characterization of a *phaZ* mutant. *Archives of  
737 Microbiology* 180:309–318.

- 738 23. Bresan S, Sznajder A, Hauf W, Forchhammer K, Pfeiffer D, Jendrossek D. 2016.  
739 Polyhydroxyalkanoate (PHA) granules have no phospholipids. *Scientific Reports* 6:1–13.
- 740 24. Tokiwa Y, Calabia BP. 2004. Degradation of microbial polyesters. *Biotechnology*  
741 *Letters* 26:1181–1189.
- 742 25. Knoll M, Hamm TM, Wagner F, Martinez V, Pleiss J. 2009. The PHA Depolymerase  
743 Engineering Database: A systematic analysis tool for the diverse family of  
744 polyhydroxyalkanoate (PHA) depolymerases. *BMC Bioinformatics* 10:1–8.
- 745 26. Sood S, Sharma A, Sharma N, Kanwar SS. 2018. Carboxylesterases: Sources,  
746 Characterization and Broader Applications. *Insights in Enzyme Research* 01.
- 747 27. Abe T, Kobayashi T, Saito T. 2005. Properties of a novel intracellular poly(3-  
748 hydroxybutyrate) depolymerase with high specific activity (*PhaZd*) in *Wautersia eutropha*  
749 H16. *Journal of Bacteriology* 187:6982–6990.
- 750 28. Handrick R, Reinhardt S, Kimmig P, Jendrossek D. 2004. The “intracellular” poly(3-  
751 hydroxybutyrate) (PHB) depolymerase of *Rhodospirillum rubrum* is a periplasm-located  
752 protein with specificity for native PHB and with structural similarity to extracellular PHB  
753 depolymerases. *Journal of Bacteriology* 186:7243–7253.
- 754 29. Tokiwa Y, Calabia BP, Ugwu CU, Aiba S. 2009. Biodegradability of plastics.  
755 *International Journal of Molecular Sciences* 10:3722–3742.
- 756 30. European Bioplastics. 2019. Frequently Asked Questions on Bioplastics. European  
757 Bioplastics, Berlin, Germany.
- 758 31. ASTM International. 2015. ASTM D5338-15: Standard Test Method for Determining  
759 Aerobic Biodegradation of Plastic Materials Under Controlled Composting Conditions,  
760 Conditions, Incorporating Thermophilic Temperatures. ASTM Standards, Pennsylvania,  
761 United States.
- 762 32. Haider TP, Volker J, Kramm J, Landfester K, Wurm FR. 2019. Plastics of the Future?  
763 The Impact of Biodegradable Polymers on the Environment and on Society. *Angewandte*  
764 *Chemie - International Edition* 58:50–62.
- 765 33. Martínez V, de la Peña F, García-Hidalgo J, de la Mata I, García JL, Prieto MA. 2012.  
766 Identification and biochemical evidence of a medium-chain-length polyhydroxyalkanoate  
767 depolymerase in the *Bdellovibrio bacteriovorus* predatory hydrolytic Arsenal. *Applied and*  
768 *Environmental Microbiology* 78:6017–6026.
- 769 34. Hug LA, Baker BJ, Anantharaman K, Brown CT, Probst AJ, Castelle CJ, Butterfield  
770 CN, Hermsdorf AW, Amano Y, Ise K, Suzuki Y, Dudek N, Relman DA, Finstad KM,  
771 Amundson R, Thomas BC, Banfield JF. 2016. A new view of the tree of life. *Nature*  
772 *Microbiology* 1:1–6.
- 773 35. Meyer F, Paarmann D, D’Souza M, Olson R, Glass EM, Kubal M, Paczian T, Rodriguez  
774 A, Stevens R, Wilke A, Wilkening J, Edwards RA. 2008. The metagenomics RAST server  
775 - A public resource for the automatic phylogenetic and functional analysis of  
776 metagenomes. *BMC Bioinformatics* 9:1–8.
- 777 36. Markowitz VM, Chen IMA, Chu K, Szeto E, Palaniappan K, Grechkin Y, Ratner A,  
778 Jacob B, Pati A, Huntemann M, Liolios K, Pagani I, Anderson I, Mavromatis K, Ivanova  
779 NN, Kyrpides NC. 2012. IMG/M: The integrated metagenome data management and  
780 comparative analysis system. *Nucleic Acids Research* 40:123–129.
- 781 37. Podar M, Gilmour CC, Brandt CC, Soren A, Brown SD, Crable BR, Palumbo A v.,  
782 Somenahally AC, Elias DA. 2015. Global prevalence and distribution of genes and  
783 microorganisms involved in mercury methylation. *Science Advances* 1:1–13.



- 784 38. Holert J, Cardenas E, Bergstrand LH, Zaikova E, Hahn AS, Hallam SJ, Mohn WW.  
785 2018. Metagenomes reveal global distribution of bacterial steroid catabolism in natural,  
786 engineered, and host environments. *mBio* 9:1–18.
- 787 39. Alteio L., Schulz F, Seshadri R, Varghese N, Rodriguez-Reillo W, Ryan E, Goudeau D,  
788 Eichorst SA, Malmstrom RR, Bowers RM, Katz LA, Blanchard JL, Woyke T. 2020.  
789 Complementary Metagenomic Approaches Improve Reconstruction of Microbial  
790 Diversity in a Forest Soil. *mSystems* 5:1–18.
- 791 40. Schulz F, Alteio L, Goudeau D, Ryan EM, Yu FB, Malmstrom RR, Blanchard J, Woyke  
792 T. 2018. Hidden diversity of soil giant viruses. *Nature Communications* 9:1–9.
- 793 41. Sharrar A, Crits-Christoph A, Meheust R, Diamond S, Starr E, Banfield JF. 2019.  
794 Bacterial secondary metabolite biosynthetic potential in soil varies with phylum, depth,  
795 and vegetation type. *bioRxiv* 818815.
- 796 42. Diamond S, Andeer PF, Li Z, Crits-Christoph A, Burstein D, Anantharaman K, Lane  
797 KR, Thomas BC, Pan C, Northen TR, Banfield JF. 2019. Mediterranean grassland soil C–  
798 N compound turnover is dependent on rainfall and depth, and is mediated by genomically  
799 divergent microorganisms. *Nature Microbiology* 4:1356–1367.
- 800 43. Bouma-Gregson K, Olm MR, Probst AJ, Anantharaman K, Power ME, Banfield JF.  
801 2019. Impacts of microbial assemblage and environmental conditions on the distribution  
802 of anatoxin-a producing cyanobacteria within a river network. *ISME Journal* 13:1618–  
803 1634.
- 804 44. Acinas SG, Sánchez P, Salazar G, Cornejo-Castillo FM, Sebastián M, Logares R,  
805 Sunagawa S, Hingamp P, Ogata H, Lima-Mendez G, Roux S, González JM, Arrieta JM,  
806 Alam IS, Kamau A, Bowler C, Raes J, Pesant S, Bork P, Agustí S, Gojobori T, Bajic V,  
807 Vaqué D, Sullivan MB, Pedrós-Alió C, Massana R, Duarte CM, Gasol JM. 2019.  
808 Metabolic Architecture of the Deep Ocean Microbiome. *bioRxiv* 635680.
- 809 45. He S, Malfatti SA, McFarland JW, Anderson FE, Pati A, Huntemann M, Tremblay J, de  
810 Rio TG, Waldrop MP, Windham-Myers L, Tringe SG. 2015. Patterns in wetland  
811 microbial community composition and functional gene repertoire associated with methane  
812 emissions. *mBio* 6:1–15.
- 813 46. Butterfield CN, Li Z, Andeer PF, Spaulding S, Thomas BC, Singh A, Hettich RL, Suttle  
814 KB, Probst AJ, Tringe SG, Northen T, Pan C, Banfield JF. 2016. Proteogenomic analyses  
815 indicate bacterial methylotrophy and archaeal heterotrophy are prevalent below the grass  
816 root zone. *PeerJ* 2016:1–28.
- 817 47. Anantharaman K, Brown CT, Hug LA, Sharon I, Castelle CJ, Probst AJ, Thomas BC,  
818 Singh A, Wilkins MJ, Karaoz U, Brodie EL, Williams KH, Hubbard SS, Banfield JF.  
819 2016. Thousands of microbial genomes shed light on interconnected biogeochemical  
820 processes in an aquifer system. *Nature Communications* 7:1–11.
- 821 48. Oyserman BO, Noguera DR, del Rio TG, Tringe SG, McMahon KD. 2016.  
822 Metatranscriptomic insights on gene expression and regulatory controls in *Candidatus*  
823 *Accumulibacter phosphatis*. *ISME Journal* 10:810–822.
- 824 49. Yao Q, Li Z, Song Y, Wright SJ, Guo X, Tringe SG, Tfaily MM, Paša-Tolić L, Hazen  
825 TC, Turner BL, Mayes MA, Pan C. 2018. Community proteogenomics reveals the  
826 systemic impact of phosphorus availability on microbial functions in tropical soil. *Nature*  
827 *Ecology and Evolution* 2:499–509.

- 828 50. Flores-Núñez VM, Fonseca-García C, Desgarenes D, Eloë-Fadrosch E, Woyke T,  
829 Partida-Martínez LP. 2020. Functional Signatures of the Epiphytic Prokaryotic  
830 Microbiome of Agaves and Cacti. *Frontiers in Microbiology* 10:1–13.
- 831 51. Hug LA, Thomas BC, Sharon I, Brown CT, Sharma R, Hettich RL, Wilkins MJ,  
832 Williams KH, Singh A, Banfield JF. 2016. Critical biogeochemical functions in the  
833 subsurface are associated with bacteria from new phyla and little studied lineages.  
834 *Environmental Microbiology* 18:159–173.
- 835 52. Lavy A, McGrath DG, Matheus Carnevali PB, Wan J, Dong W, Tokunaga TK, Thomas  
836 BC, Williams KH, Hubbard SS, Banfield JF. 2019. Microbial communities across a  
837 hillslope-riparian transect shaped by proximity to the stream, groundwater table, and  
838 weathered bedrock. *Ecology and Evolution* 9:6869–6900.
- 839 53. Hartman WH, Ye R, Horwath WR, Tringe SG. 2017. A genomic perspective on  
840 stoichiometric regulation of soil carbon cycling. *ISME Journal* 11:2652–2665.
- 841 54. Kimbrel JA, Ballor N, Wu YW, David MM, Hazen TC, Simmons BA, Singer SW,  
842 Jansson JK. 2018. Microbial community structure and functional potential along a  
843 hypersaline gradient. *Frontiers in Microbiology* 9:1–15.
- 844 55. Edgar RC. 2004. MUSCLE: Multiple sequence alignment with high accuracy and high  
845 throughput. *Nucleic Acids Research* 32:1792–1797.
- 846 56. Stamatakis A. 2006. RAxML-VI-HPC: Maximum likelihood-based phylogenetic  
847 analyses with thousands of taxa and mixed models. *Bioinformatics* 22:2688–2690.
- 848 57. Miller MA, Pfeiffer W, Schwartz T. 2010. Creating the CIPRES Science Gateway for  
849 inference of large phylogenetic trees 2010 Gateway Computing Environments Workshop,  
850 GCE 2010.
- 851 58. Darriba Di, Posada D, Kozlov AM, Stamatakis A, Morel B, Flouri T. 2020. ModelTest-  
852 NG: A New and Scalable Tool for the Selection of DNA and Protein Evolutionary  
853 Models. *Molecular Biology and Evolution* 37:291–294.
- 854 59. Bateman A. 2019. UniProt: A worldwide hub of protein knowledge. *Nucleic Acids*  
855 *Research* 47:506–515.
- 856 60. O’Leary NA, Wright MW, Brister JR, Ciuffo S, Haddad D, McVeigh R, Rajput B,  
857 Robbertse B, Smith-White B, Ako-Adjei D, Astashyn A, Badretdin A, Bao Y, Blinkova  
858 O, Brover V, Chetvernin V, Choi J, Cox E, Ermolaeva O, Farrell CM, Goldfarb T, Gupta  
859 T, Haft D, Hatcher E, Hlavina W, Joardar VS, Kodali VK, Li W, Maglott D, Masterson P,  
860 McGarvey KM, Murphy MR, O’Neill K, Pujar S, Rangwala SH, Rausch D, Riddick LD,  
861 Schoch C, Shkeda A, Storz SS, Sun H, Thibaud-Nissen F, Tolstoy I, Tully RE, Vatsan  
862 AR, Wallin C, Webb D, Wu W, Landrum MJ, Kimchi A, Tatusova T, DiCuccio M, Kitts  
863 P, Murphy TD, Pruitt KD. 2016. Reference sequence (RefSeq) database at NCBI: Current  
864 status, taxonomic expansion, and functional annotation. *Nucleic Acids Research* 44:733–  
865 745.
- 866 61. Burley SK, Berman HM, Bhikadiya C, Bi C, Chen L, Costanzo L di, Christie C, Duarte  
867 JM, Dutta S, Feng Z, Ghosh S, Goodsell DS, Green RK, Guranovic V, Guzenko D,  
868 Hudson BP, Liang Y, Lowe R, Peisach E, Periskova I, Randle C, Rose A, Sekharan M,  
869 Shao C, Tao YP, Valasatava Y, Voigt M, Westbrook J, Young J, Zardecki C, Zhuravleva  
870 M, Kurisu G, Nakamura H, Kengaku Y, Cho H, Sato J, Kim JY, Ikegawa Y, Nakagawa A,  
871 Yamashita R, Kudou T, Bekker GJ, Suzuki H, Iwata T, Yokochi M, Kobayashi N,  
872 Fujiwara T, Velankar S, Kleywegt GJ, Anyango S, Armstrong DR, Berrisford JM, Conroy  
873 MJ, Dana JM, Deshpande M, Gane P, Gáborová R, Gupta D, Gutmanas A, Koča J, Mak

- 874 L, Mir S, Mukhopadhyay A, Nadzirin N, Nair S, Patwardhan A, Paysan-Lafosse T, Pravda  
875 L, Salih O, Sehnal D, Varadi M, Váreková R, Markley JL, Hoch JC, Romero PR,  
876 Baskaran K, Maziuk D, Ulrich EL, Wedell JR, Yao H, Livny M, Ioannidis YE. 2019.  
877 Protein Data Bank: The single global archive for 3D macromolecular structure data.  
878 Nucleic Acids Research 47:520–528.
- 879 62. Parks DH, Imelfort M, Skennerton CT, Hugenholtz P, Tyson GW. 2015. CheckM:  
880 Assessing the quality of microbial genomes recovered from isolates, single cells, and  
881 metagenomes. Genome Research 25:1043–1055.
- 882 63. Price MN, Dehal PS, Arkin AP. 2010. FastTree 2 - Approximately maximum-likelihood  
883 trees for large alignments. PLoS ONE 5:1–10.
- 884 64. Letunic I, Bork P. 2016. Interactive tree of life (iTOL) v3: an online tool for the display  
885 and annotation of phylogenetic and other trees. Nucleic acids research 44:1–4.
- 886 65. Li W, Godzik A. 2006. Cd-hit: A fast program for clustering and comparing large sets of  
887 protein or nucleotide sequences. Bioinformatics 22:1658–1659.
- 888 66. Kuraku S, Zmasek CM, Nishimura O, Katoh K. 2013. aLeaves facilitates on-demand  
889 exploration of metazoan gene family trees on MAFFT sequence alignment server with  
890 enhanced interactivity. Nucleic acids research 41:22–28.
- 891 67. Price MN, Dehal PS, Arkin AP. 2010. FastTree 2 - Approximately maximum-likelihood  
892 trees for large alignments. PLoS ONE 5.
- 893 68. Martínez V, de Santos PG, García-Hidalgo J, Hormigo D, Prieto MA, Arroyo M, de la  
894 Mata I. 2015. Novel extracellular medium-chain-length polyhydroxyalkanoate  
895 depolymerase from *Streptomyces exfoliatus* K10 DSMZ 41693: a promising biocatalyst  
896 for the efficient degradation of natural and functionalized mcl-PHAs. Applied  
897 Microbiology and Biotechnology 99:9605–9615.
- 898 69. Santos M, Gangoiti J, Keul H, Möller M, Serra JL, Llama MJ. 2013. Polyester hydrolytic  
899 and synthetic activity catalyzed by the medium-chain-length poly(3-hydroxyalkanoate)  
900 depolymerase from *Streptomyces venezuelae* SO1. Applied Microbiology and  
901 Biotechnology 97:211–222.
- 902 70. Kim DY, Hyun CK, Sun YK, Young HR. 2005. Molecular characterization of  
903 extracellular medium-chain-length poly(3-hydroxyalkanoate) depolymerase genes from  
904 *Pseudomonas alcaligenes* strains. Journal of Microbiology 43:285–294.
- 905 71. Schirmer A, Jendrossek D. 1994. Molecular characterization of the extracellular poly(3-  
906 hydroxyoctanoic acid) [P(3HO)] depolymerase gene of *Pseudomonas fluorescens* GK13  
907 and of its gene product. Journal of Bacteriology 176:7065–7073.
- 908 72. Lebreton LCM, van der Zwet J, Damsteeg JW, Slat B, Andrady A, Reisser J. 2017.  
909 River plastic emissions to the world's oceans. Nature Communications 8:1–10.
- 910 73. Wright SL, Thompson RC, Galloway TS. 2013. The physical impacts of microplastics  
911 on marine organisms: a review. Environmental Pollution 178:483–492.
- 912 74. Volova TG, Prudnikova S v., Vinogradova ON, Syrvacheva DA, Shishatskaya EI. 2017.  
913 Microbial Degradation of Polyhydroxyalkanoates with Different Chemical Compositions  
914 and Their Biodegradability. Microbial Ecology 73:353–367.
- 915 75. California Department of Resources Recycling and Recovery. 2012. Report Topic: PLA  
916 and PHA biodegradation in the marine environment. CalRecycle: California Department  
917 of Resources Recycling and Recovery, California, United States.

- 918 76. Lim SP, Gan SN, Tan IKP. 2005. Degradation of medium-chain-length  
919 polyhydroxyalkanoates in tropical forest and mangrove soils. *Applied Biochemistry and*  
920 *Biotechnology* 126:23–33.
- 921 77. Zettler ER, Mincer TJ, Amaral-Zettler LA. 2013. Life in the “plastisphere”: Microbial  
922 communities on plastic marine debris. *Environmental Science and Technology* 47:7137–  
923 7146.
- 924 78. Pinnell LJ, Turner JW. 2019. Shotgun metagenomics reveals the benthic microbial  
925 community response to plastic and bioplastic in a coastal marine environment. *Frontiers in*  
926 *Microbiology* 10:1–15.
- 927 79. Fierer N. 2017. Embracing the unknown: Disentangling the complexities of the soil  
928 microbiome. *Nature Reviews Microbiology* 15:579–590.
- 929 80. Mergaert J, Swings J. 1996. Biodiversity of microorganisms that degrade bacterial and  
930 synthetic polyesters. *Journal of Industrial Microbiology and Biotechnology* 17:463–469.
- 931 81. Emadian SM, Onay TT, Demirel B. 2017. Biodegradation of bioplastics in natural  
932 environments. *Waste Management* 59:526–536.
- 933 82. Quecholac-Piña X, Hernández-Berriel M del C, Mañón-Salas M del C, Espinosa-  
934 Valdemar RM, Vázquez-Morillas A. 2020. Degradation of Plastics under Anaerobic  
935 Conditions: A Short Review. *Polymers* 12:1–18.
- 936 83. Stamps BW, Lyles CN, Suflita JM, Masoner JR, Cozzarelli IM, Kolpin DW, Stevenson  
937 BS. 2016. Municipal solid waste landfills harbor distinct microbiomes. *Frontiers in*  
938 *Microbiology* 7:1–16.
- 939 84. Spokas K, Bogner J, Chanton JP, Morcet M, Aran C, Graff C, Golvan YM le, Hebe I.  
940 2006. Methane mass balance at three landfill sites: What is the efficiency of capture by  
941 gas collection systems? *Waste Management* 26:516–525.
- 942 85. Pittmann T, Steinmetz H. 2017. Polyhydroxyalkanoate production on waste water  
943 treatment plants: Process scheme, operating conditions and potential analysis for German  
944 and European municipal waste water treatment plants. *Bioengineering* 54:1–24.
- 945 86. Handrick R, Reinhardt S, Focarete ML, Scandola M, Adamus G, Kowalczyk M,  
946 Jendrossek D. 2001. A New Type of Thermoalkalophilic Hydrolase of *Paucimonas*  
947 *lemoinei* with High Specificity for Amorphous Polyesters of Short Chain-length  
948 Hydroxyalkanoic Acids. *Journal of Biological Chemistry* 276:36215–36224.
- 949 87. Hatheway CL. 1990. Toxigenic Clostridia. *Clinical Microbiology Reviews* 3:66–98.
- 950 88. Pérez-Rivero C, López-Gómez JP, Roy I. 2019. A sustainable approach for the  
951 downstream processing of bacterial polyhydroxyalkanoates: State-of-the-art and latest  
952 developments. *Biochemical Engineering Journal* 150:1–14.
- 953

954

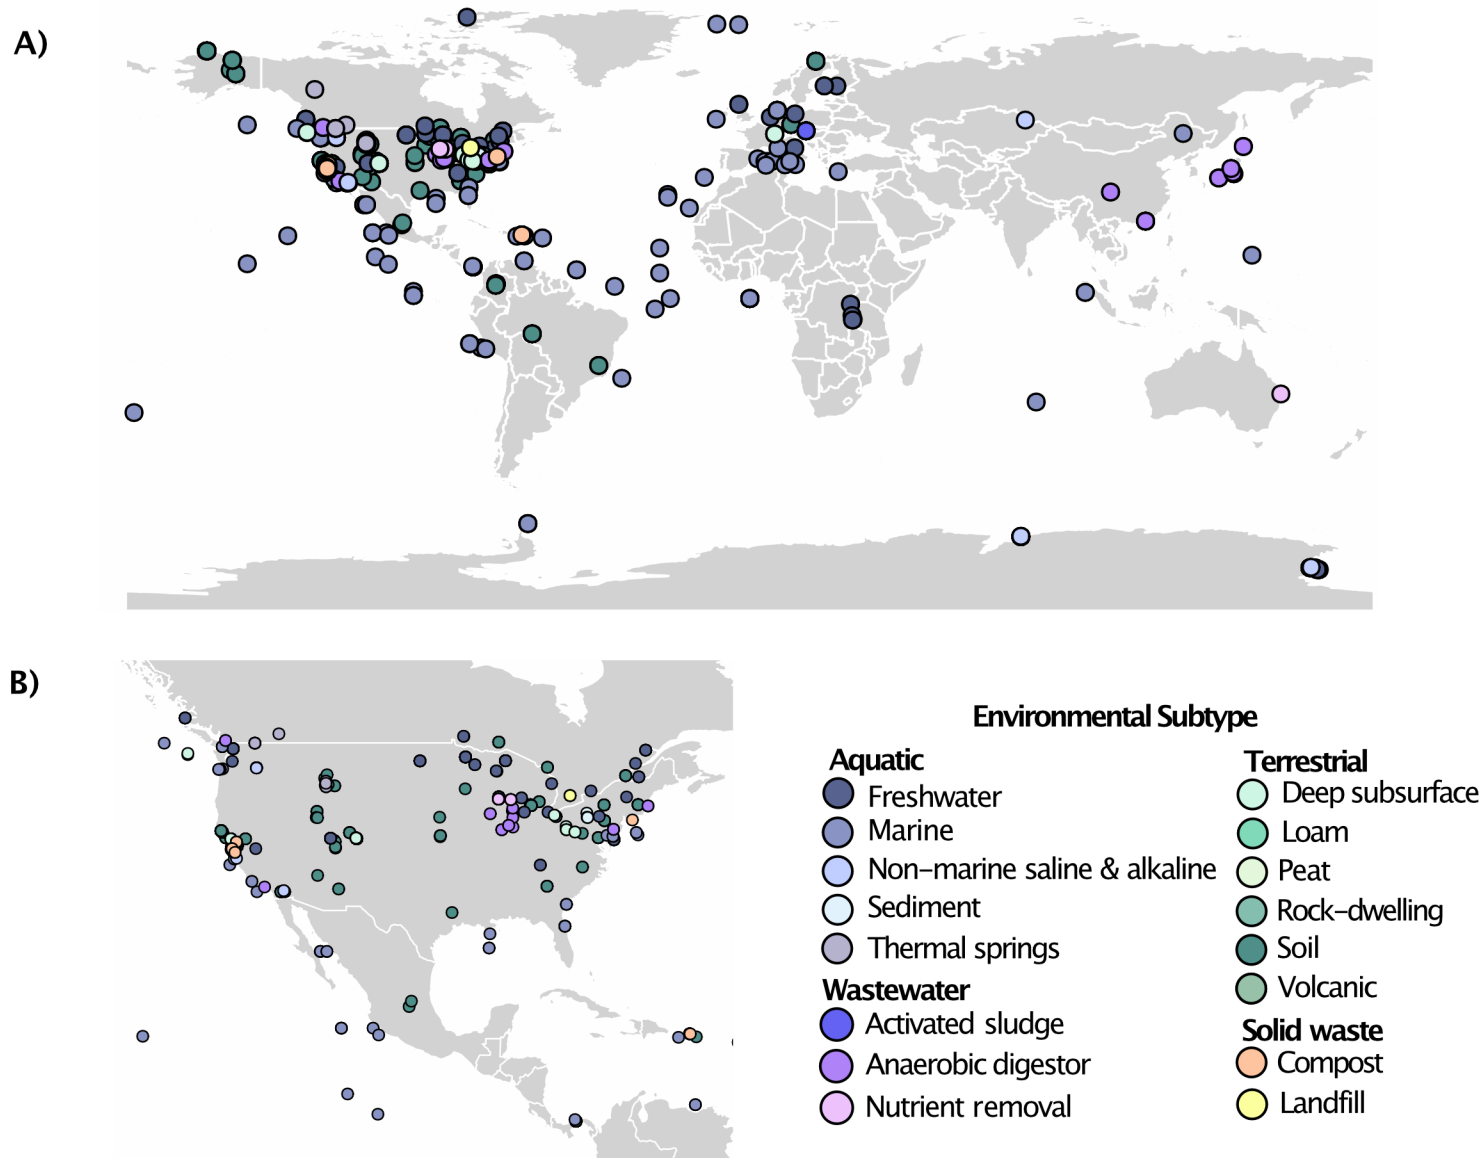

**Fig 1**

## Metagenomes with predicted PHA depolymerase(s) (%)

| Environment         | PHAscIT1   | PHAscIT2   | PHAmcl    | Total      | Metagenomes (n) |
|---------------------|------------|------------|-----------|------------|-----------------|
| <b>Aquatic</b>      |            |            |           |            |                 |
| Freshwater          | 18%        | 11%        | 2%        | 19%        | 946             |
| Marine              | 20%        | 22%        | 4%        | 31%        | 452             |
| Saline and Alkaline | 24%        | 21%        | 2%        | 36%        | 87              |
| Sediment            | 44%        | 39%        | 4%        | 48%        | 114             |
| Thermal springs     | 2%         | 1%         | 0%        | 2%         | 383             |
|                     | <b>17%</b> | <b>13%</b> | <b>2%</b> | <b>21%</b> | <b>1,982</b>    |
| <b>Solid Waste</b>  |            |            |           |            |                 |
| Compost             | 33%        | 63%        | 0%        | 67%        | 30              |
| Landfill            | 75%        | 75%        | 0%        | 75%        | 4               |
|                     | <b>38%</b> | <b>65%</b> | <b>0%</b> | <b>68%</b> | <b>34</b>       |
| <b>Terrestrial</b>  |            |            |           |            |                 |
| Deep subsurface     | 13%        | 6%         | 1%        | 15%        | 143             |
| Loam                | 0%         | 0%         | 0%        | 0%         | 3               |
| Peat                | 0%         | 0%         | 0%        | 0%         | 5               |
| Rock-dwelling       | 100%       | 67%        | 0%        | 100%       | 3               |
| Soil                | 48%        | 37%        | 6%        | 51%        | 1,437           |
| Volcanic            | 0%         | 0%         | 0%        | 0%         | 5               |
|                     | <b>45%</b> | <b>34%</b> | <b>6%</b> | <b>48%</b> | <b>1,596</b>    |
| <b>Wastewater</b>   |            |            |           |            |                 |
| Activated Sludge    | 9%         | 6%         | 5%        | 9%         | 141             |
| Anaerobic digester  | 70%        | 87%        | 13%       | 94%        | 54              |
| Nutrient removal    | 60%        | 77%        | 11%       | 77%        | 35              |
|                     | <b>31%</b> | <b>36%</b> | <b>8%</b> | <b>40%</b> | <b>230</b>      |
| <b>Total</b>        | <b>30%</b> | <b>24%</b> | <b>4%</b> | <b>34%</b> | <b>3,842</b>    |

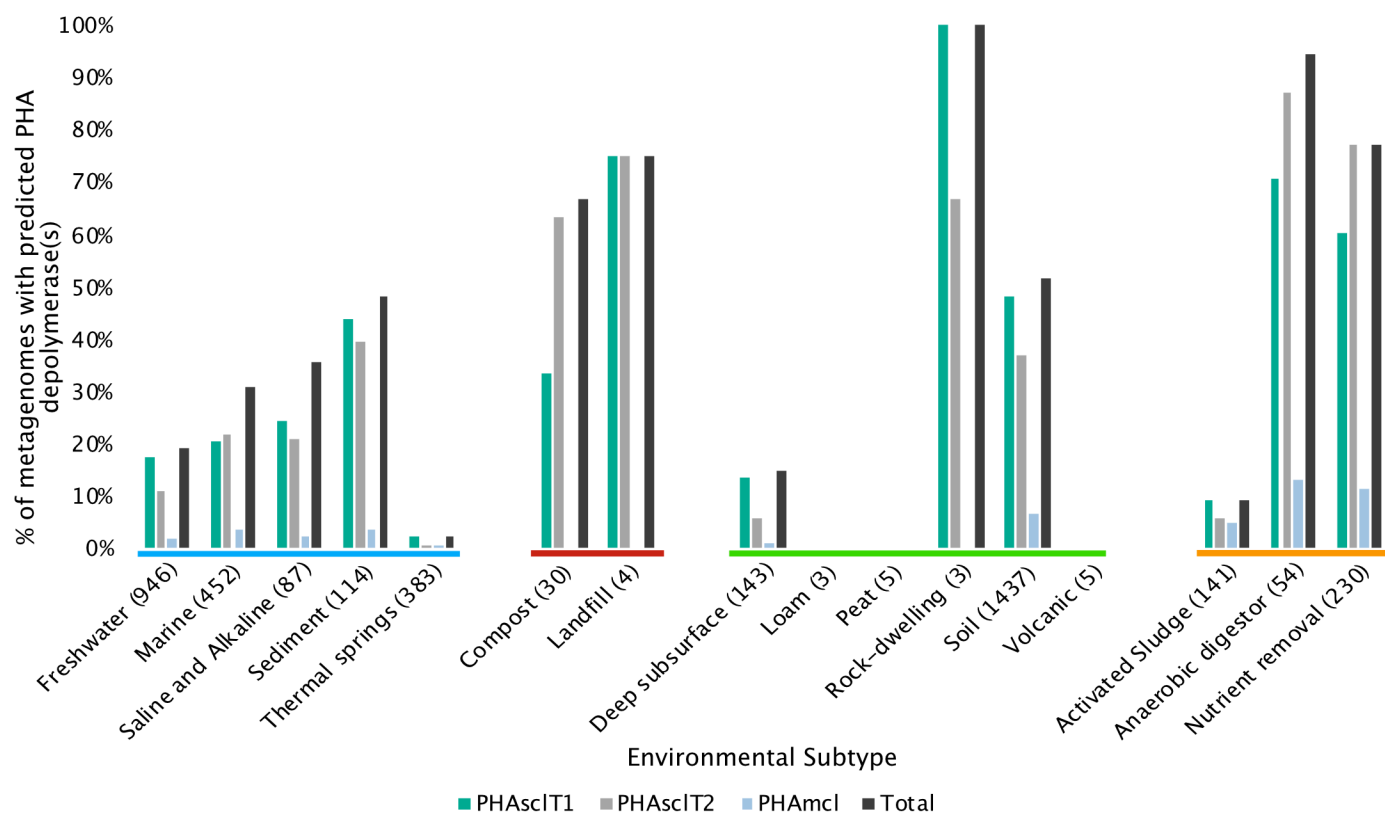

**Fig 2**

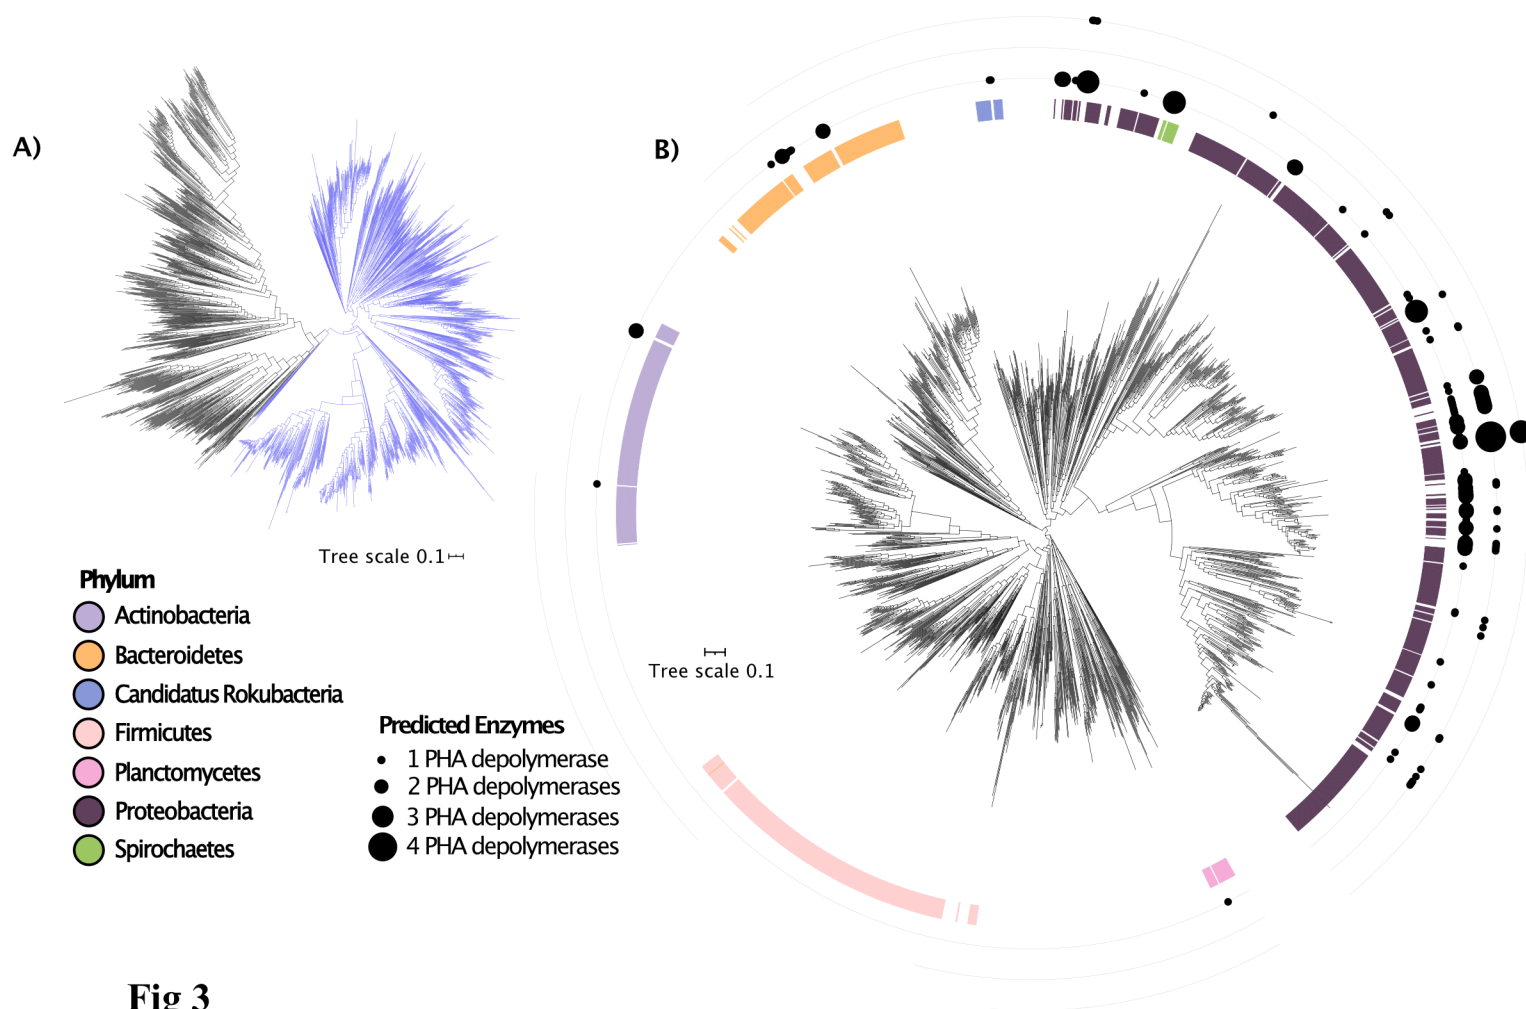

**Fig 3**

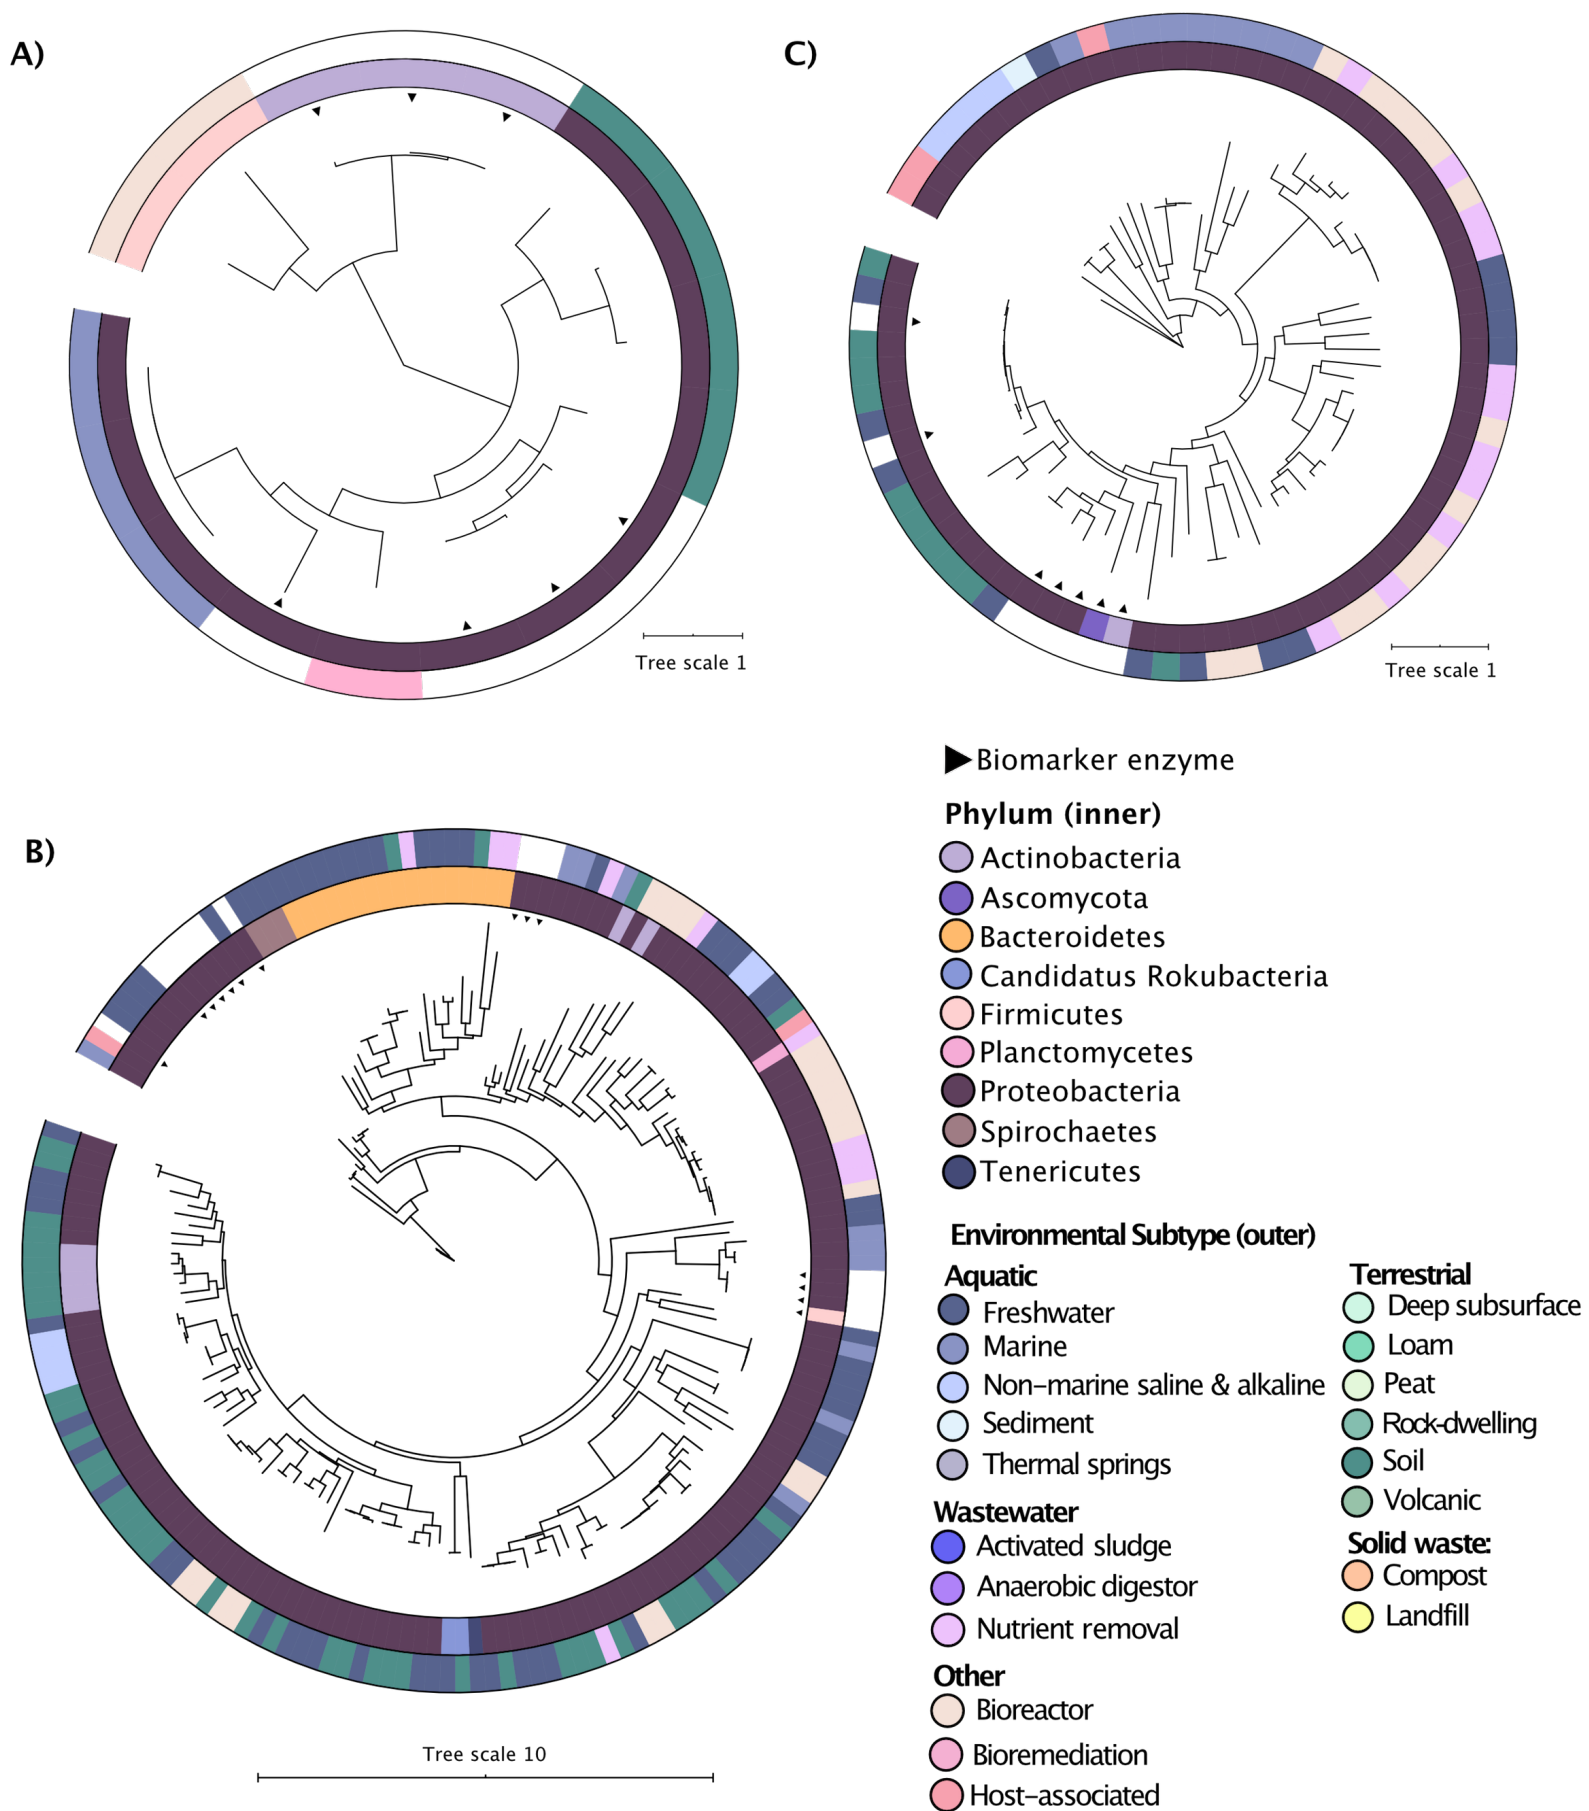

**Fig 4**
